# Supplementary material for: Single-cell atlas of human urine-derived stem cell chondrogenesis enables a non-invasive, xeno-free platform for translational cartilage and skeletal disease research
Source: Research Square preprint supplement (doi:10.21203/rs.3.rs-8230463/v1), 2026-01-19
Supplement: Supplementary file 1 [file 02a95ca3f0efb231637e5943.pdf]

**Additional file 1 for:**

**Single-cell atlas of human urine-derived stem cell chondrogenesis establishes a non-invasive, xeno-free platform for translational cartilage research**

Alexander Schulz<sup>1</sup>, Emily M. Brockmann<sup>1</sup>, Miriam Zentgraf<sup>2</sup>, Andreas S. Baur<sup>2</sup>, Steffen Uebe<sup>1</sup>, Arif B. Ekici<sup>1</sup>, Mark Dedden<sup>3</sup>, Sebastian Zundler<sup>3,4</sup>, Christian T. Thiel<sup>1\*</sup>

<sup>1</sup>Institute of Human Genetics, University Hospital Erlangen, FAU Erlangen-Nürnberg, Erlangen, Germany

<sup>2</sup>Department of Dermatology, University Hospital Erlangen, FAU Erlangen-Nürnberg, Erlangen, Germany

<sup>3</sup>Department of Medicine 1, University Hospital Erlangen and Friedrich-Alexander-University Erlangen-Nürnberg, Erlangen, Germany

<sup>4</sup>Deutsches Zentrum Immuntherapie (DZI), University Hospital Erlangen, Erlangen, Germany

**\*Corresponding author:**

Prof. Dr. Christian T. Thiel, MBA  
Universitätsklinikum Erlangen  
Friedrich-Alexander-Universität Erlangen-Nürnberg FAU  
Kussmaullallee 4  
91054 Erlangen, Germany  
Phone: +49-9131-44637  
Email: Christian.Thiel@uk-erlangen.de

**Keywords:**

single-cell RNA sequencing, urine-derived stem cells, chondrogenesis, xeno-free culture, cartilage biology, skeletal dysplasia modeling, translational regenerative medicine, disease modelling, tissue engineering, adult stem cells

## Supplementary Figures

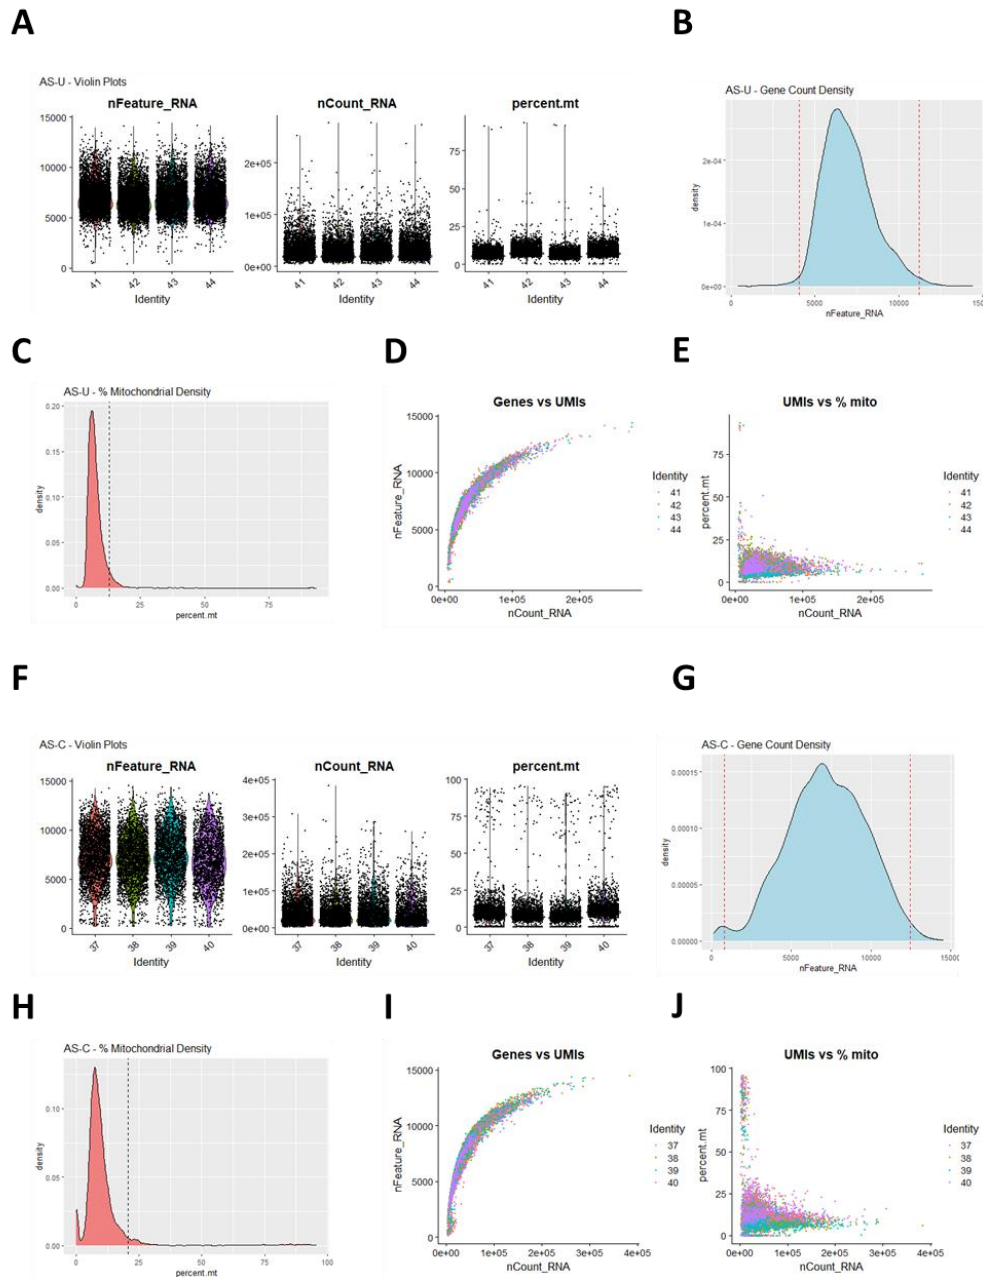

**Figure S1: Quality control of single cell RNA-Sequencing data.**

Panels A–E (AS U= undifferentiated) and F–J (AS C= chondrogenic) show the same set of QC visualizations for each condition.

(A/F) Violin plots of detected genes per cell (nFeature\_RNA), UMI counts per cell (nCount\_RNA), and percent mitochondrial reads (percent\_mt).

(B/G) Density of detected genes with dashed lines marking the 1st and 99th percentile thresholds.

(C/H) Density of percent mitochondrial reads with a dashed line at the 95th percentile threshold.

(D/I) Scatter of UMI counts vs. detected genes, illustrating library complexity.

(E/J) Scatter of UMI counts vs. percent mitochondrial reads, highlighting high mt cells.

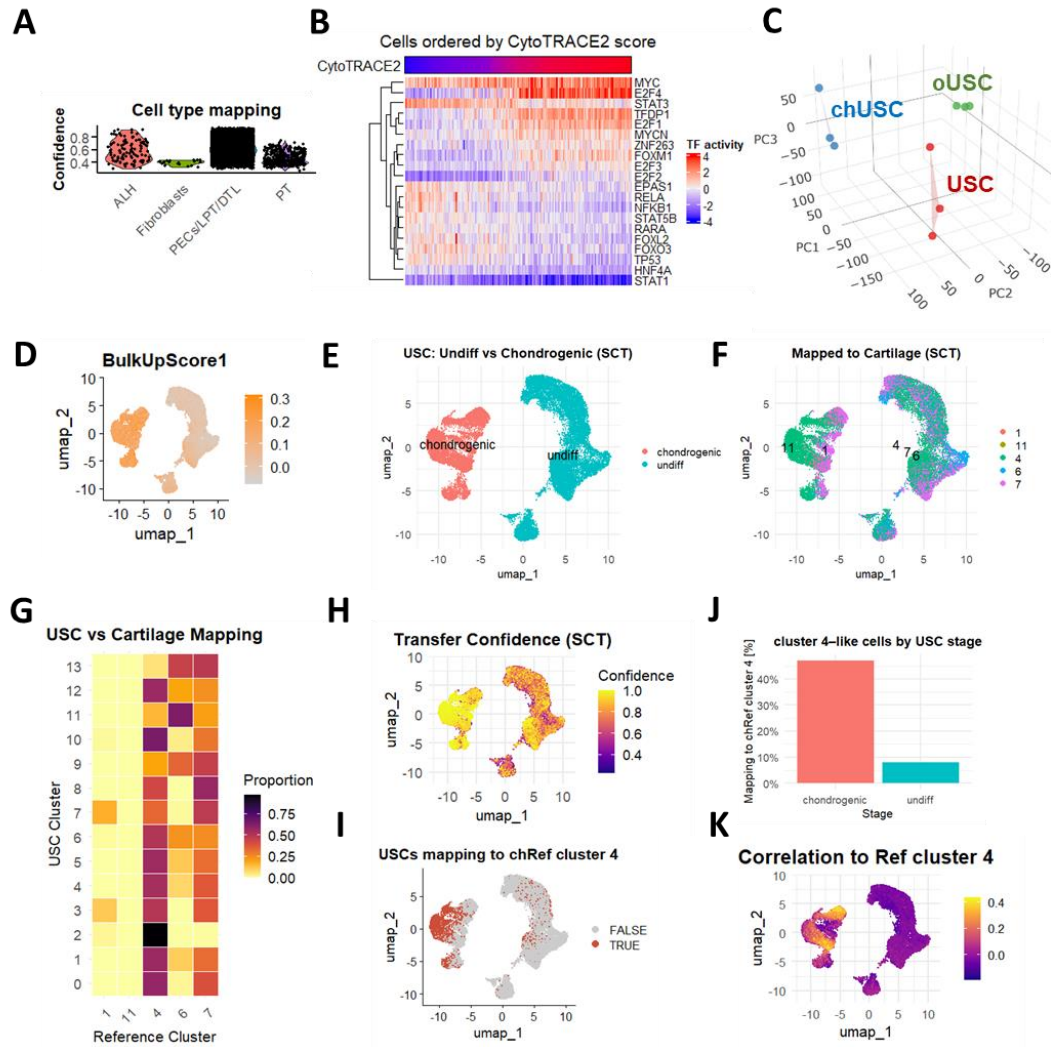

**Figure S2. Supporting information for computational analysis.**

(A) Violin plot showing predicted cell types for undifferentiated USCs.

(B) Top 20 stemness-related transcription factor heatmap.

(C) 3D-PCA of differentiated and undifferentiated replicates.

(D) BulkUpScore reflecting upregulated genes in bulk RNA-sequencing, highlighted in the merged undifferentiated and chondrogenic USC Seurat object.

(E) UMAP of the merged object with cell type annotations.

(F) Merged UMAP mapped to a cartilage reference sample, highlighting predicted reference labels.

(G) Heatmap visualizing mapping proportions of the merged USC object to the reference objects.

(H) UMAP of the merged object with transfer-confidence color gradient.

(I) UMAP of the merged object highlighting cells with mapping confidence to the chondrocyte reference cluster > 0.7.

(J) Fraction of cells mapping to the reference cluster across stages.

(K) Correlation values with the reference cluster mapped onto the merged UMAP.

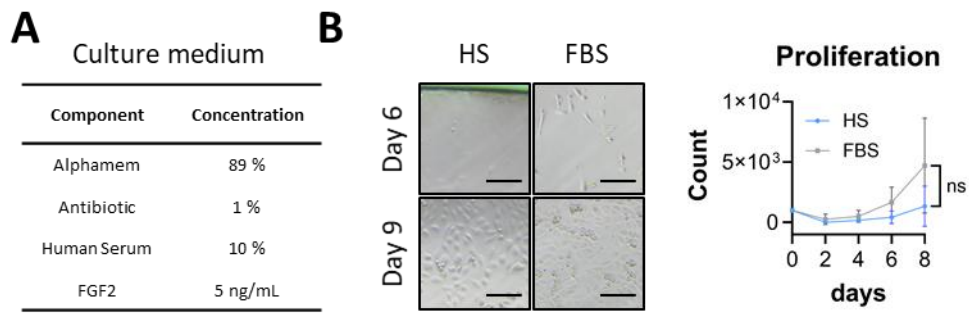

**Figure S3. Expansion of USCs under HS conditions.**

(A) Medium recipe for USC expansion using autologous serum.

(B) Representative images of colonies emerging under HS or FBS expansion at day 6 and day 9.

(C) Proliferation curves of HS- or FBS-expanded USCs (n = 3).
